# Supplementary material for: Impact of Olive Trees on the Microclimatic and Edaphic Environment of the Understorey Durum Wheat in an Alley Orchard of the Mediterranean Area
Source: MDPI journal article supplement (doi:10.3390/agronomy12020527), 2022-02-20
Supplement: s1 [file s1]

# SUPPLEMENTARY INFORMATIONS

**Table S1.** Dates of sowing and harvesting of durum wheat, and average values of the main climatic indicators recorded between sowing and harvesting dates in 2015-16 and 2016-17 growing seasons. Climatic data are from a Meteo-France weather station located at the INRAE station, 100m from the experimental fields.

| Growing season | Sowing date  | Harvesting date | Mean daily temperature (min to max) (°C) between sowing and harvesting | Rainfall (mm) between sowing and harvesting (n. of rainy days) | Potential evapotranspiration Penman (mm) between sowing and harvesting |
|----------------|--------------|-----------------|------------------------------------------------------------------------|----------------------------------------------------------------|------------------------------------------------------------------------|
| 2015-16        | 17 Nov. 2015 | 06 Jul. 2016    | 13.0 (-1.1 to +32.9)                                                   | 223 (48 days)                                                  | 590                                                                    |
| 2016-17        | 02 Dec. 2016 | 30 Jun. 2017    | 12.8 (-6.1 to +36.2)                                                   | 282 (49 days)                                                  | 551                                                                    |

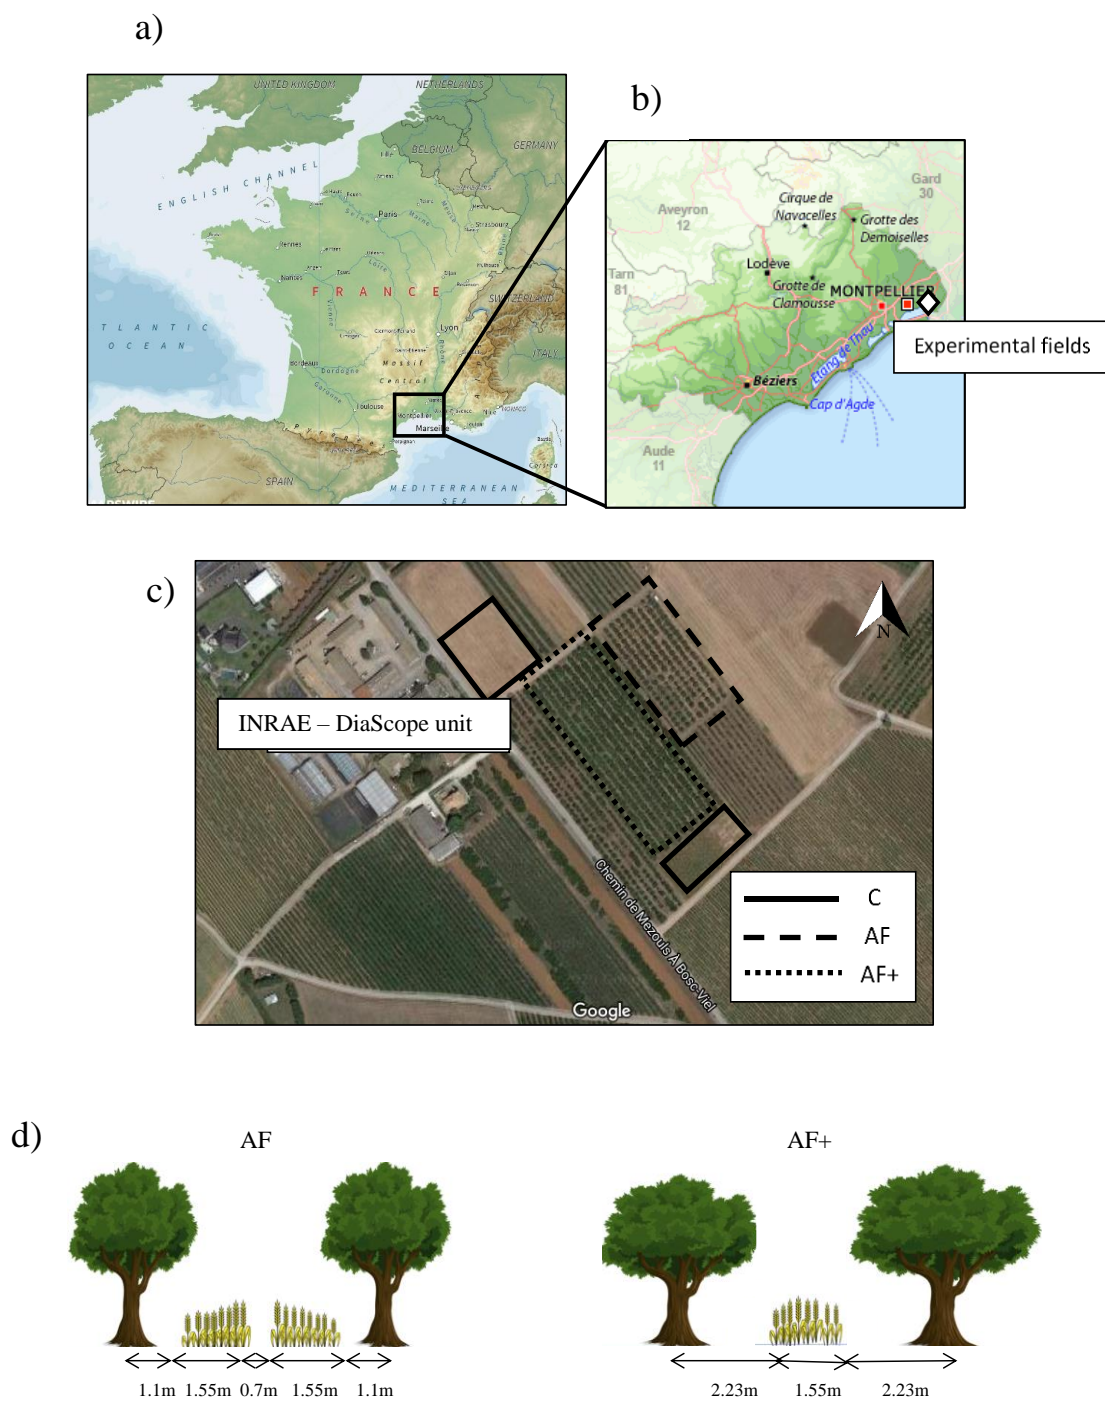

**Figure S1.** Location of the experimental site in the South of France (a, b), 15 km east from Montpellier; the fields hosting the three treatments (C, AF and AF+) at the INRAE experimental station (c); and the durum wheat - olive trees intercropping in AF and AF+ treatments (d).

**Table S2.** Details of the sensors used for recording microclimatic and edaphic parameters in the 3 treatments (C, AF, and AF+) from wheat sowing to harvesting during 2015-16 and 2016-17 growing seasons.

| Parameter                                                | Sensors                                                                                                                | Recording time and units                                                                                                                                                                                         |
|----------------------------------------------------------|------------------------------------------------------------------------------------------------------------------------|------------------------------------------------------------------------------------------------------------------------------------------------------------------------------------------------------------------|
| <b>Global radiation</b>                                  | SKS 1110 PYRANOMETER<br>Skye Instruments LTD, linearity error -0.2%<br>Working range: 0 – 500 w/m <sup>2</sup>         | C: recorded hourly.<br>AF and AF+: recorded every 5 seconds, then averaged every 15 minutes.<br>(Joule/cm <sup>2</sup> in C; W/m <sup>2</sup> in AF and AF+; converted to $\mu\text{mol.s}^{-1}.\text{m}^{-2}$ ) |
| <b>PAR</b>                                               | Pyranometer SP-LITE<br>Campbell Scientific Ltd<br>Linearity error <10%<br>Working range: 0.4 - 1.1 $\mu\text{m}$       |                                                                                                                                                                                                                  |
| <b>Air temperature (T °C) and relative humidity (RH)</b> | HMP60 probes, through INTERCAP capacitive RH chip<br>Working range T °C = -40° to 60°C<br>Working range RH = 0 to 100% | C: recorded hourly.<br>AF: recorded every 15 minutes, then averaged hourly.<br>(Temperature: °C; Relative humidity: %)                                                                                           |
| <b>Wind speed (mean and maximum)</b>                     | 3 cups anemometer Campbell Scientific Ltd<br>Linearity error <1.5%<br>Working range: 0 – 45m/s                         | C: recorded hourly.<br>AF and AF+: recorded every 15 minutes.<br>(m.s <sup>-1</sup> )                                                                                                                            |
| <b>Soil water availability</b>                           | WATERMARK Model 200SS<br>IRROMETER company<br>Working range: 0 – 239 kPa                                               | Recorded every 15 minutes.<br>(KPa)                                                                                                                                                                              |

**Table S3.** Average air temperature and relative humidity recorded in C and AF treatments within three times of the day (Time1= 12pm-5 am, Time2= 6am-12am, Time3= 1pm-11pm), during 2016-17 growing season at stem elongation, heading and anthesis, and maturity. Within the same wheat cycle period and time of the day, air temperature (°C) and relative humidity (%) are also expressed as difference between AF and C treatments. For each microclimate parameter, in a same line, different letters indicate significant difference according to the Tukey's HSD test ( $P \leq 0.05$ ).

| Cycle period         | Time   | Air temperature (°C) |        |                 | Air relative humidity (%) |        |                 |
|----------------------|--------|----------------------|--------|-----------------|---------------------------|--------|-----------------|
|                      |        | C                    | AF     | Difference AF-C | C                         | AF     | Difference AF-C |
| Stem elongation      | Time 1 | 6.5 a                | 6.6 a  | +0.1            | 85.5 a                    | 83.0 a | -2.5            |
|                      | Time 2 | 9.3 a                | 7.6 b  | -1.7            | 76.4 a                    | 78.7 b | +2.3            |
|                      | Time 3 | 10.6 b               | 11.2 a | +0.6            | 73.6 b                    | 68.2 a | -5.4            |
| Heading and anthesis | Time 1 | 9.0 a                | 9.1 a  | +0.1            | 82.8 a                    | 81.6 a | -1.2            |
|                      | Time 2 | 15.3 a               | 12.9 b | -2.4            | 62.9 a                    | 68.2b  | +5.3            |
|                      | Time 3 | 15.3 b               | 16.9 a | +1.6            | 63.6 b                    | 58.6 a | -5.0            |
| Maturity             | Time 1 | 16.7 a               | 16.1 a | -0.6            | 89.2 a                    | 88.5 a | -0.7            |
|                      | Time 2 | 24.2 a               | 21.6 b | -2.6            | 60.0 a                    | 66.1 b | +6.1            |
|                      | Time 3 | 22.7 b               | 24.2 a | +1.5            | 67.6 b                    | 59.7 a | -7.9            |
| Average              | Time 1 | 9.2 a                | 9.3 a  | +0.1            | 85.9 a                    | 84.0 a | -1.9            |
|                      | Time 2 | 13.7 a               | 11.8 b | -1.9            | 70.5 a                    | 73.9 b | +3.4            |
|                      | Time 3 | 14.1 b               | 15.3 a | +1.2            | 70.6 b                    | 64.5 a | -6.1            |
