# Supplementary material for: Impact of Olive Trees on the Microclimatic and Edaphic Environment of the Understorey Durum Wheat in an Alley Orchard of the Mediterranean Area
Source: MDPI journal article supplement (doi:10.3390/agronomy12020527), 2022-02-20
Supplement: s1 [file s1]

Archive with 1 entries (1 files):
- agronomy-1600915-supplementary.pdf
